# Supplementary material for: The interaction between dispersed crude oil droplets and particulate matter
Source: Royal Society of Chemistry journal article supplement (doi:10.1039/d0em00114g), 2020-01-01
Supplement: d0em00114g1.pdf [file d0em00114g1.pdf]

## Supporting Information

### *The determination of standard curve*

Doing full wavelength scanning of solvent and sample, and the maximum peak was selected besides the solvent peak, and mark the wavelength corresponding maximum peak as  $\lambda_{\text{max}}$ . The oil solution with known concentration (0, 10, 20, 30, 40, 50 mg/L) was prepared and the absorbance of those solution was determined at  $\lambda_{\text{max}}$  and a standard curve of the absorbance corresponding to the oil concentration was made.

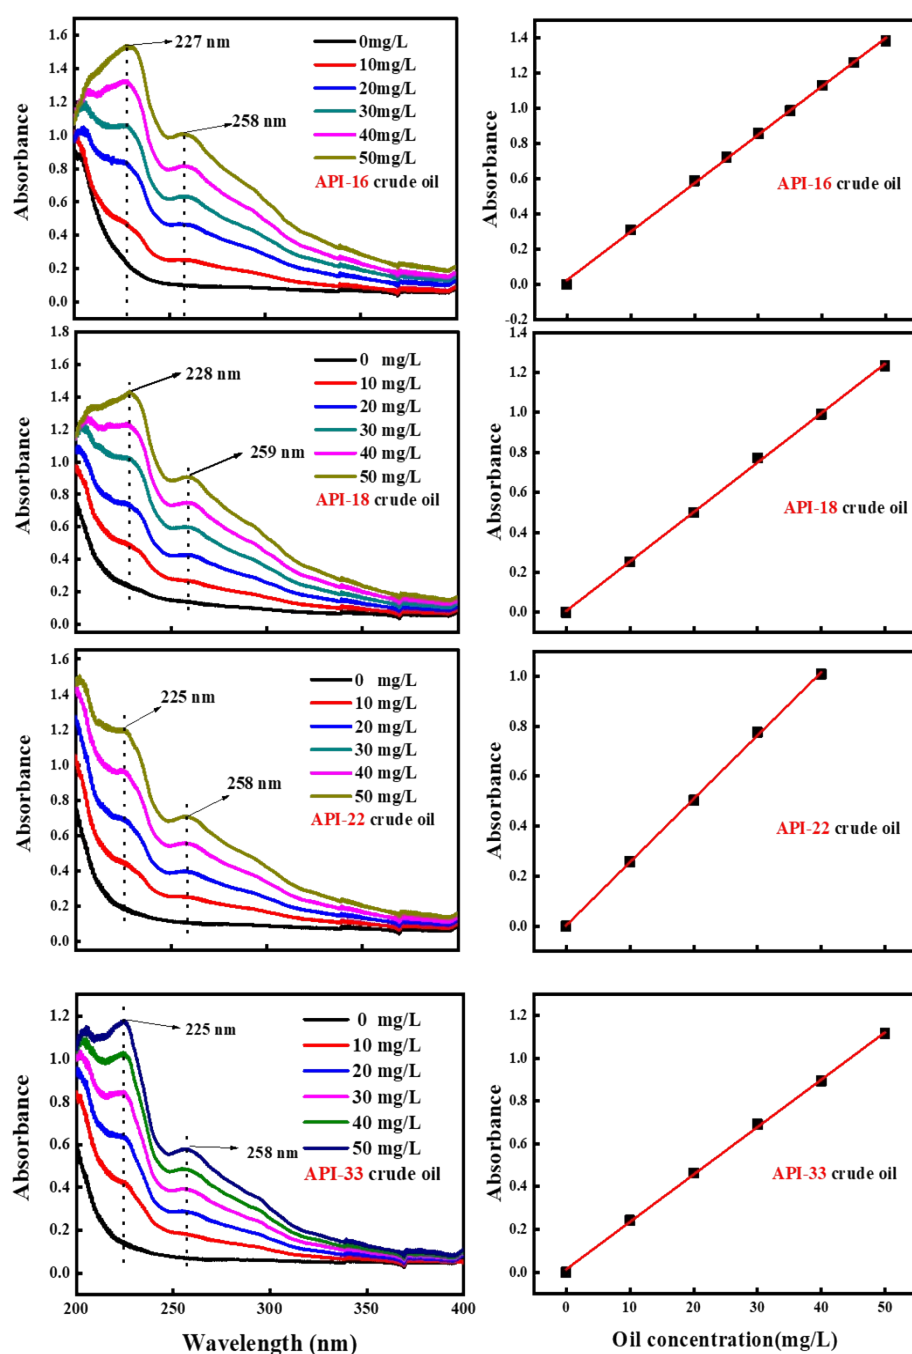

**Fig. S1.** Full-wavelength scanning picture and standard curves of four crude oil

SLY:  $Y=0.027X+0.024$  ( $R^2=0.9991$ ); S(1)

SJH:  $Y=0.025X+0.0064$  ( $R^2=0.9991$ ); S(2)

YYS:  $Y=0.025X+0.0022$  ( $R^2=0.9994$ ); S(3)

YYH:  $Y=0.022X+0.014$  ( $R^2=0.9992$ ). S(4)

16

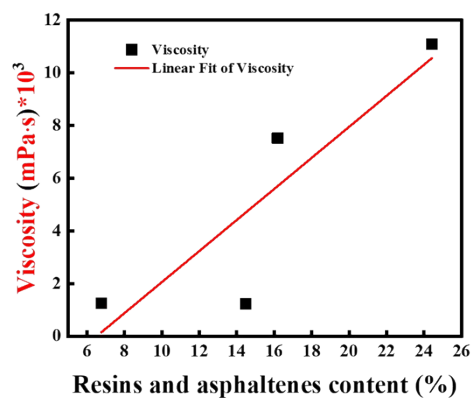

17

18

**Fig. S2.** The relation between crude oil viscosity and polar compounds.

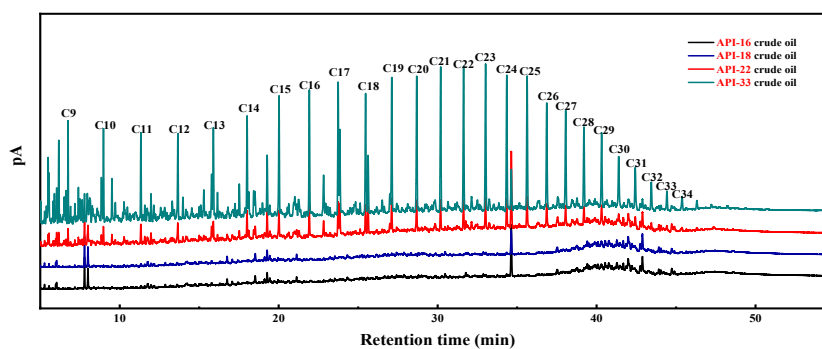

19

20

21

**Fig. S3.** GC-FID image of four types of crude oil

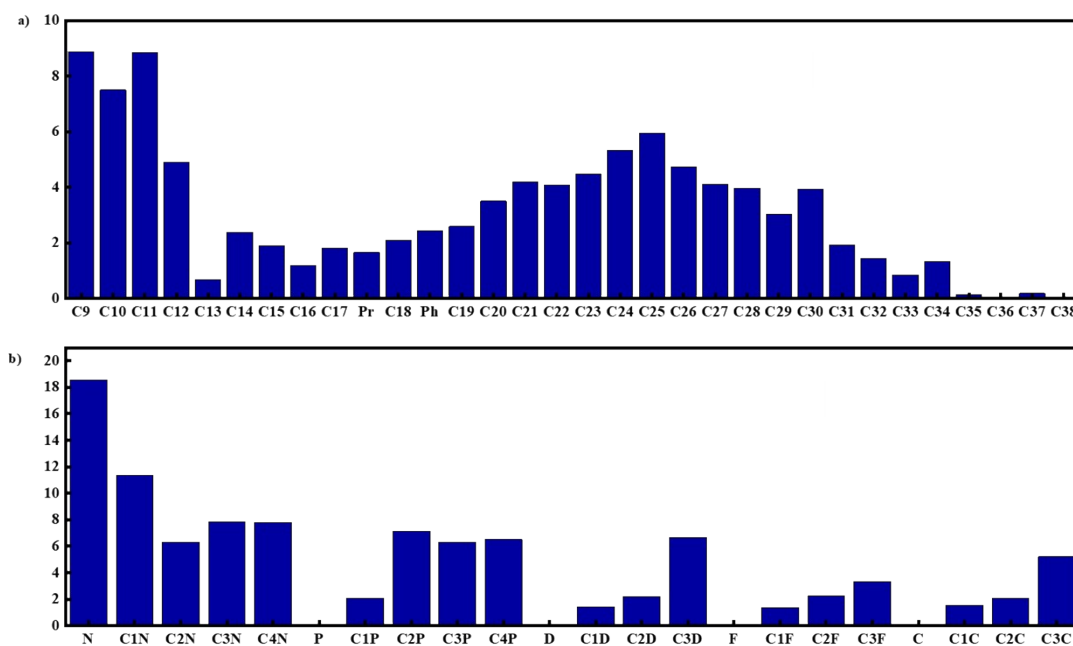

22

**Fig. S4. a)** The water phase percentage of total *n*-alkanes ranging from C9-C38 in relation to API-

24

22-OPAs

25

b) The water phase percentage of five targeted PAHs and their alkylated homologues in relation to API-22-OPAs

26

27

28

**Table S1:** Particulate matters information summary

| Name                                                                                               | Size(μm)  | Zeta potential(mV)   | Classification                           | Percentage | Contact angle(°)                                                                       |
|----------------------------------------------------------------------------------------------------|-----------|----------------------|------------------------------------------|------------|----------------------------------------------------------------------------------------|
| 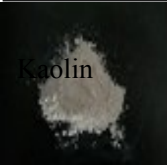 Kaolin           | 1-6       | -22.7                | -                                        | -          |  7  |
|  Natural sediment | 30.8-38.5 | -18.3                | 30.8 μm<br>34.2 μm<br>36.2 μm<br>38.5 μm | 1:1:1:1    |  15 |
|  Sand             | 154-212   | too large to measure | 154 μm<br>160 μm<br>180 μm<br>212 μm     | 1:1:1:1    | too large to measure                                                                   |

29

30

31

**Table S2.** Characteristics of the chemical dispersant, Tween 80

| Indices                             | Characteristics       |
|-------------------------------------|-----------------------|
| Appearance                          | Amber, viscous liquid |
| pH                                  | 5-7                   |
| Flash point                         | >110°C                |
| Viscosity (under 25°C)              | 400-600 mPa·s         |
| Hydrophile-Lipophile balance number | 15.0                  |
| Half lethal concentration in mice   | 7.5 mL/kg             |

32

33

$$TPH(\%) = C_{oil-OPAs} \times V / C_{oil} / V_{add} \times 100\%$$

S(5)

34

where  $C_{oil-OPAs}$  was oil concentration in OPAs, mg/L;  $C_{oil}$  was the initial oil

35

concentration, mg/L;  $V$  was volume of extraction liquid, mL;  $F$  was dilute factor;  $V_{add}$

36

was 50 mL.

37

38
